# Supplementary material
Source: publisher figshare collection journal article supplement (https://karger.figshare.com/ndownloader/files/8956474)
Supplement: Supplementary file 1 [file 8956474]

## Erratum

---

In the article by Fanglong Wu et al., entitled 'Submandibular gland transfer for the prevention of postradiation xerostomia in patients with head and neck cancer: a systematic review and meta-analysis' [ORL 2015;77:70–86, DOI: 10.1159/000371854], the following needs to be added: Fanglong Wu and Shengxin Weng contributed equally to this paper and are both co-first authors.
